# Supplementary material for: Synthesis of Molybdenum Sulfide/Tellurium Hetero-Composite by a Simple One-Pot Hydrothermal Technique for High-Performance Supercapacitor Electrode Material
Source: MDPI journal article supplement (doi:10.3390/nano11092346), 2021-09-09
Supplement: s1 [file s1]

## *Supplementary materials*

# **Synthesis of Molybdenum Sulfide/Tellurium Hetero-Composite by a Simple One-Pot Hydrothermal Technique for High-Performance Supercapacitor Electrode Material**

Hem Prakash Karki <sup>1,3,†</sup>, Hyojae Kim <sup>1,†</sup>, Jinmu Jung <sup>1,2,\*</sup> and Jonghyun Oh <sup>1,2,\*</sup>

<sup>1</sup>. Department of Mechanical Design Engineering, College of Engineering, Jeonbuk National University, Jeonju 54896, South Korea; hyojaekim@jbnu.ac.kr

<sup>2</sup>. Department of Nano-bio Mechanical System Engineering, College of Engineering, Jeonbuk National University, Jeonju 54896, South Korea

<sup>3</sup>. Department of Environmental Engineering, Korea University, 2511 Sejong-ro, Sejong City 30019, South Korea; hpkarki666@gmail.com (Current address)

\* Correspondence: jmjung@jbnu.ac.kr (J.J.), jonghyuno@jbnu.ac.kr (J.O.)

† These authors contributed equally to this work.

## **Materials and methods**

### **Fabrication of working electrode**

Ni-foam was cut into squares of  $1 \times 1 \text{ cm}^2$  in dimension, and it was first treated with 3 M HCl solution under ultrasonication for 30 min to remove any oxide film present on its surface. Again, it was treated with acetone, and ultrasonicated for 1 h in the water bath. Then the treated Ni-foam was washed with DI-water several times, followed by absolute alcohol to ensure the surface of Ni-foam was cleaned. Finally, the clean piece of Ni-foam was dried in vacuum oven at 60 °C for 6 h. The working electrode was fabricated with 4 mg of material mixture, where the as-prepared nanocomposite was taken as exactly 3.2 mg, 0.4 mg of activated carbon, and 0.4 mg of polyvinylidene fluoride (PVDF) in the mass ratios 80:10:10. The mixture content was poured in mortar, where N-methyl-2-pyrrolidone (NMP) was added and mixed thoroughly to make the homogenous slurry. All of this nanocomposite slurry was slowly drop cast over the surface of the cleaned Ni-foam substrate, and finally kept in the oven at 70 °C for 12 h.

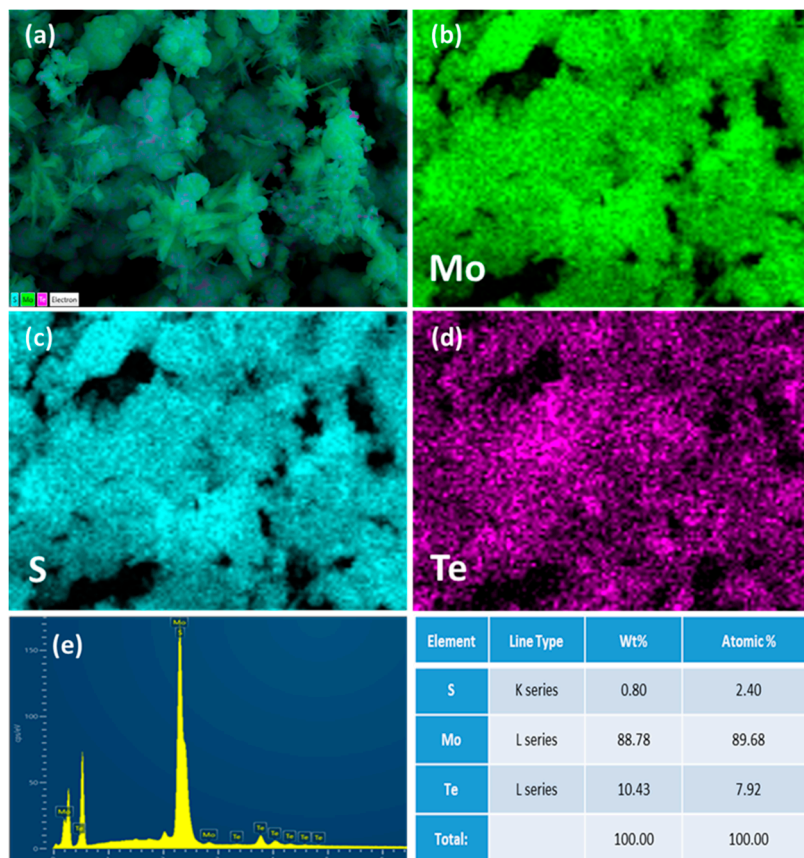

**Figure S1.** Energy Dispersive Spectroscopy (EDS) analysis: (a) MoS<sub>2</sub>/Te hetero-composite, (b) Mo, (c) S, (d) Te, and (e) elemental spectrum and table for the elemental composition of the MoS<sub>2</sub>/Te nanocomposite.

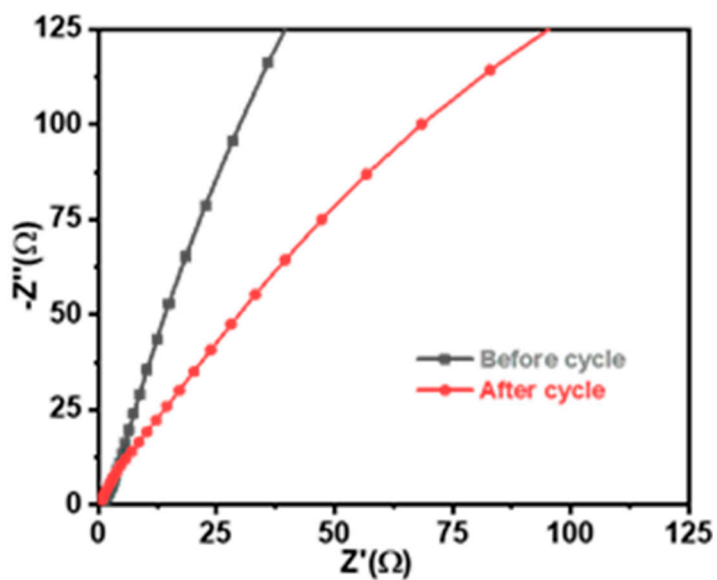

**Figure S2.** EIS profile of MoS<sub>2</sub>/Te before and after the 4,000 cycles.
